# Supplementary material for: Signaling pathway activation drift during aging: Hutchinson-Gilford Progeria Syndrome fibroblasts are comparable to normal middle-age and old-age cells
Source: Aging (Albany NY). 2015 Jan 9;7(1):26–37. doi: 10.18632/aging.100717 (PMC4350323; doi:10.18632/aging.100717)
Supplement: Supplementary file 1 [file aging-07-26-s001.xlsx]

## Sheet: output_onco_combined_update_cor
ID	E-MEXP-2597_10	E-MEXP-2597_6	E-MEXP-2597_7	E-MEXP-2597_8	E-MEXP-2597_9	E-MEXP-3097_Hom.1	E-MEXP-3097_Hom.2	E-MEXP-3097_Hom.3	GSM87553	GSM87751	GSM88282	GSM88283	GSM88284	GSM88285	GSM88286	GSM88287	GSM88288	GSM88298	GSM88299	GSM88300	GSM88301	GSM88302	GSM88303	GSM88304	GSM88305	GSM88306	GSE15829_AG04064	GSE15829_AG04456	GSE15829_AG13349	GSE15829_AG13369	GSE15829_AG14251	GSM426279.AVG_Signal	GSM426280.AVG_Signal	GSM426281.AVG_Signal	GSM426282.AVG_Signal	GSM426257	GSM426260	GSM426261	GSM426262.AVG_Signal	GSM426263	GSM426264	GSM426265	GSM426266	GSM426267	GSM426268	GSM426269	GSM426270.AVG_Signal	GSM426271	GSM426272
Group	HGPS	HGPS	HGPS	HGPS	HGPS	HGPS	HGPS	HGPS	HGPS	HGPS	HGPS	HGPS	HGPS	HGPS	HGPS	HGPS	HGPS	HGPS	HGPS	HGPS	HGPS	HGPS	HGPS	HGPS	HGPS	HGPS	Old	Middle	Old	Old	Old	Young	Young	Young	Young	Middle	Middle	Middle	Middle	Middle	Middle	Middle	Middle	Middle	Middle	Middle	Middle	Middle	Middle
AHR Main Pathway	-0.691111	-3.95311	-2.46255	-2.48678	-2.44756	-0.810274	0	-0.00329225	1.22413	2.38999	2.63752	3.25163	2.14649	1.5442	1.7456	1.78841	0	2.59381	2.40378	2.2511	3.35102	2.70571	2.54665	1.67555	1.00897	1.09862	0	0.308174	1.98256	-1.68125	-5.70567	-0.21096	-0.648705	0.022907	-0.321294	-0.608226	0	0.331988	-0.440826	-1.04271	-1.24818	0.716711	0	0	-0.192797	-0.56132	0.193316	-0.884879	-0.525669
AKT Main Pathway	17.2516	20.8344	15.4599	19.1036	-0.89396	17.5181	6.38424	15.9575	24.1101	18.1512	16.3906	38.2325	16.4275	22.0893	12.8609	13.026	7.62233	6.22833	6.56339	3.14672	7.12399	7.35028	5.71866	5.37597	3.9145	2.16003	5.58394	5.92022	23.173	-0.587928	7.1246	-62.3194	14.731	-37.8898	-34.295	4.67931	8.10219	12.5651	11.424	18.0783	-2.29682	3.13614	2.86405	7.94582	0.0625742	6.74977	7.14371	2.31663	20.8641
Androgen Receptor Pathway	1.98092	-0.449709	-2.12491	-1.4032	-3.99041	13.1613	3.89778	18.8513	2.71517	1.29673	4.02625	5.28302	5.19502	4.93949	8.67691	6.3437	3.59282	4.7676	5.23142	4.35937	1.23452	2.53206	1.10396	4.83009	5.38024	7.42679	-16.1208	0.186301	-11.1914	6.29408	14.7323	-25.7194	-0.196169	-17.9724	-14.972	4.79205	3.67321	0.614061	0.33453	10.8724	-3.59293	4.92753	5.49769	3.90888	3.68677	-0.584336	1.28797	6.31385	5.88375
ATM Main Pathway	2.80369	0.959054	0.148932	-2.65274	-0.353641	-1.05436	-2.09876	-0.988849	2.71472	-0.0290983	0.37978	4.34958	1.29524	1.58782	2.13273	0	0.784782	0	0	0	0.594457	0.436057	0	0	0	0	0.547605	1.69462	16.4403	1.23913	-1.21369	1.11008	3.61422	-4.45409	1.98481	0.115965	0.58763	0.840395	2.4873	1.81497	-0.978512	0.433514	1.18247	1.25567	1.09284	0.230578	1.504	0.416213	0.988693
cAMP Main Pathway	17.7343	14.3032	7.92747	13.4317	6.94607	17.847	5.43985	19.2348	23.6334	25.7098	26.9857	16.1954	13.6951	9.56781	16.1859	6.936	5.89071	7.10071	8.94624	6.4085	4.67383	6.57352	1.69585	2.56335	3.74855	3.11306	-13.9162	-29.6607	9.00971	37.9311	8.89114	-28.791	-15.6225	-22.9389	-6.5227	5.68011	6.07946	12.7923	10.699	17.3765	3.85001	6.5202	6.82638	9.90515	0.569608	3.46233	8.16721	8.31712	23.0385
Caspase Cascade Main	-11.3009	-9.21646	0.921663	-6.17742	-11.1036	-22.0308	-10.7701	-23.2862	-8.50226	-5.62838	-10.3002	0.751673	-1.77034	-0.519422	-12.1891	-6.3372	-4.31437	4.55708	0.583498	2.22855	-2.22742	-2.33306	-0.978024	-6.10126	-4.79136	-4.60381	-15.2537	-1.31138	10.9659	-1.16498	-5.45226	40.4538	3.46125	4.00497	4.81208	-5.09781	-4.5548	-5.28949	-5.85936	-9.31885	1.50314	-4.08925	-5.01767	-3.49271	-1.54502	-0.270441	-6.07131	-3.98988	-7.46567
CD40 Main Pathway	-0.511289	1.22662	-4.77361	-3.39107	-2.97874	0.067994	-1.45286	-1.24651	4.28841	2.86878	2.82555	0.620255	0.533803	-0.326041	0.566609	-0.036643	-0.0213413	-1.3196	0.448451	0.498963	0.323027	0.879675	0.517016	0	0	0	0.197515	-0.167381	-16.681	1.79755	-5.23026	-3.76738	3.46901	-2.06215	1.38154	-1.08893	-0.773751	-0.272759	-0.817987	0	-1.82209	-0.359536	1.66987	-0.976212	0.2596	-0.857427	3.07877	1.28937	0.819832
Cellular Anti Apoptosis Main Pathway	20.9118	9.7539	12.2011	3.40277	8.54238	17.654	4.5929	9.30959	10.3482	7.34941	10.8039	8.48046	5.0005	4.40253	14.7301	6.206	3.45116	-0.522796	1.13747	-0.251975	1.23219	1.80791	-0.0194598	5.91311	4.45613	4.27989	0.798641	-1.17832	-6.20368	8.79065	40.9167	-18.0366	-7.90733	-19.2677	-3.32116	4.33391	6.47279	8.98053	9.57247	5.05332	1.97873	3.00927	2.40471	2.01677	0.327921	1.81981	1.57204	3.01221	8.28134
Chemokine Main Pathway	4.24927	13.6066	-3.36953	7.16484	0.167838	3.7516	-0.299251	11.1146	8.80449	7.63776	8.48779	8.8579	5.60316	3.99646	1.77245	1.58596	0	1.37657	3.14061	3.01615	-0.0915817	1.30645	0.517016	0	0	1.24636	5.61761	4.55885	7.90357	11.9168	1.62646	-38.1166	24.5301	-13.0761	-31.4027	-0.38286	-0.573574	3.71943	3.95176	7.97827	-0.0480338	2.2765	0.891994	2.12255	1.66411	-0.0751944	3.45434	1.75947	7.39037
Chromatin Main Pathway	2.5298	-4.55898	-2.536	2.21123	-3.99679	-0.846608	-0.672005	-0.991167	2.98119	2.12902	1.44461	0	1.97293	0	0	0.842572	0	0	0	0	0	0	0	1.16602	0	0	0.721702	0	1.08611	1.6371	-35.343	0.115646	0	3.12459	-2.55839	-0.502969	0.506029	1.07242	0.326806	-0.433415	-1.07213	0	0.530987	0.584959	-1.11309	0.880981	-0.436491	0	0.25019
Circadian Main Pathway	0.328157	0	-0.693485	-0.409099	0.786467	-0.548374	0	0	0	0	0	-0.875163	-1.08269	-1.84872	-0.407111	0	0	0	0	0	0	0	0	0	0	0	0	0	0.548792	0.0479184	1.69376	0.525484	0.414177	-0.844376	-0.566711	-1.38045	0	0	-1.64464	-1.6761	0	0	-1.05971	-1.30132	-1.72348	0	-1.33216	-1.00844	0
CREB Main Pathway	22.0742	9.5615	9.5297	7.31946	10.1708	17.4598	4.69298	17.3219	11.3343	11.5696	12.8477	-0.567731	0.516379	-2.2241	11.2938	6.0438	3.9357	2.17264	2.20727	1.70254	2.95571	4.05918	0.497556	6.10126	5.3059	6.05783	-16.0599	-0.672036	9.6963	12.7088	12.0855	-28.4914	-4.57726	-13.6164	-8.48259	3.55034	4.76678	8.37807	5.27742	10.8765	-1.65208	5.03024	4.28399	7.84372	2.41691	2.92939	5.49583	8.97808	12.4623
Cytokine Main Pathway	0	5.13497	0.730172	0.535933	0	0.79865	-2.44081	-1.60351	2.4077	0.571702	1.58616	11.8371	3.69347	8.7261	3.59908	1.03232	0	0	0	0	0	0	0	0	0	0	-1.0195	-0.0169604	3.26177	2.34447	-0.631112	-3.42777	6.2326	-7.19211	-6.28161	0	0	0	2.75267	3.04794	0	2.50882	1.78885	0	0	0	0	0	0
DNA Repair Mechanisms Pathway	-5.59869	-4.38035	-5.13706	6.83859	6.69846	0.855141	8.25954	12.2552	-4.55333	-7.26694	-9.32368	0.10596	-0.253621	2.24949	-0.542129	-1.9467	-0.944721	0.568294	-0.553197	0.000559999	1.24876	1.11082	0.681606	-0.983632	0	0.541626	-1.06386	-0.172881	2.27371	2.15153	-14.297	2.50092	-4.1311	2.34354	-1.85336	1.1289	1.24824	-2.803	-0.721689	-4.73165	-1.45654	-0.109627	3.54387	-3.70558	1.54672	-0.526267	-1.1373	-2.2812	-4.06652
EGFR Main Pathway	-0.488191	3.13349	-1.19824	6.4252	-1.89506	-0.132272	-0.75565	-0.56089	9.09159	5.80248	4.6589	3.80078	2.37547	1.95577	3.465	2.45431	0.875433	0.921236	3.7494	3.86221	2.37463	1.38113	2.03987	0.969509	1.44668	-0.0183847	3.0295	0.961546	2.79403	10.8559	-2.42877	-19.7593	4.10547	1.83863	-5.50187	0.7603	-0.200177	0.617878	-0.0369802	2.45146	-0.430734	0.135041	0.427519	0.931462	2.06298	1.01104	0.773439	0.458614	0.932974
ErbB Family Main Pathway	1.35509	4.30164	0.538825	4.64265	1.52713	1.92667	-0.637264	5.86605	6.66477	4.29865	4.20781	-3.55271	0.950203	-1.90382	1.09215	0.749523	0	-1.46096	0.766845	0.636033	0.0419789	0	0.470661	0	0.514533	-0.818357	0.728438	-1.50623	1.56455	10.1353	1.08071	-17.3325	6.63775	0.896243	-5.10732	-0.847287	-0.545049	1.00056	-0.215318	1.55209	-0.498361	0.537329	0.502331	1.6283	2.29552	-1.49469	1.22468	1.90982	0
ERK Signaling Main Pathway	16.8725	31.5359	16.4263	37.2279	2.58931	32.6193	18.0642	23.3613	41.6513	35.6437	38.5191	46.0138	29.884	30.2948	19.3789	14.2596	7.25604	5.40265	6.1866	5.4315	9.49004	9.37949	9.66099	6.29136	5.2485	2.38562	-3.98615	7.45363	8.86398	21.8294	28.3857	-87.3765	29.8622	-55.5435	-29.8581	10.2814	18.9909	22.5083	21.2914	6.41168	0.433217	8.70162	7.27446	4.50093	1.8535	9.92389	13.3997	13.8642	22.2947
Erythropoeitin Main Pathway	7.31432	12.5995	-0.540088	10.5228	8.65846	3.42738	1.72457	6.19626	4.51229	1.76	0.873036	1.61211	3.53548	3.98925	3.89497	2.16986	1.44804	2.40599	5.48679	5.56925	0.704666	2.19657	1.68953	3.86645	3.74413	3.55995	1.52871	4.4119	-9.44292	-5.27875	-2.54841	-32.0782	5.30147	-1.63367	-1.60055	-0.75375	-1.22377	3.24013	0.525544	4.9915	0.973701	1.1656	1.67548	6.59841	3.92153	-1.77781	8.1185	4.9773	1.08808
Estrogen Main Pathway	19.083	13.2129	8.72989	8.22912	5.92477	11.1428	5.99297	14.7472	12.8908	10.7387	11.7531	15.876	12.5627	12.7146	11.0083	6.06424	4.07637	6.13621	7.39609	4.58613	8.74739	8.79087	7.18833	5.37597	4.42903	3.0906	-0.162925	2.75932	8.58262	-1.64237	10.8264	-40.9674	1.95319	-11.2943	-13.3652	4.03328	3.70505	5.68335	6.2836	6.25015	-1.82401	4.01292	3.41721	-1.52379	-0.455682	-0.041841	0.489199	5.36862	6.15074
Fas Signaling Pathway (Negative)	5.72544	-1.27385	-3.31826	0.137823	2.22629	-1.08584	1.37205	1.29445	2.60082	2.047	1.35575	1.47609	-0.54395	-0.518664	0.0747654	-0.119828	0	-1.63223	-0.725591	0	-0.71277	0	0	0	0	0	-0.742252	1.31675	-0.00522063	1.42333	1.418	-4.91822	-0.0194758	3.61934	-5.42308	-2.14378	0	-2.20578	-2.21307	-0.421978	-0.133512	-0.446655	0	0.227334	-1.33205	-1.09713	0.302772	0.820394	-0.0182944
Fas Signaling Pathway (Positive)	0.067385	-0.295184	-1.88426	1.30601	-0.575115	0	1.14752	1.3747	1.73473	0.511489	0.696361	1.35554	0.352951	2.18971	0.680298	0.53191	0	1.54056	1.35693	1.24515	0.673709	0	0.498706	0	0	0	0	0	0.348696	1.71598	-0.132443	-0.946223	0.641353	-0.828689	-0.550214	0	-0.650311	-1.38414	-1.0774	0.503453	-0.419235	0.135041	0.427519	-0.00424197	-0.537219	0.432579	-0.409061	2.07024	0.755213
FLT3 Main Pathway	1.01498	6.13285	-0.932842	1.5568	-2.05743	0.35738	-2.93178	-1.79455	8.79806	7.84344	9.06677	6.28488	4.31887	4.00946	4.90664	3.69032	1.7474	0.835334	2.99009	3.11602	3.03729	1.82452	2.05818	2.40914	1.44668	0.799973	-0.187143	0.583507	-17.6859	7.19793	14.7768	-11.413	4.25041	-4.34847	1.81984	-1.10084	0.738145	5.70291	0.210433	3.98663	-0.688422	0.702662	0.936195	4.06425	1.47262	1.96865	2.70004	2.05156	2.77468
Glucocorticoid Receptor Main Pathway	10.8759	6.45298	2.50761	2.99968	0.698008	-1.41391	-1.09172	3.08546	12.0904	7.11439	8.32421	22.0197	10.2623	16.8182	4.81926	3.47493	2.09475	-0.905645	-0.776679	-0.902274	-0.935598	0.525542	0.504234	0.583012	0	0	-0.54963	1.49002	9.40948	5.98181	17.5894	-19.4233	14.9334	-22.7264	-15.749	0.995989	2.58215	7.54979	4.19679	9.99936	-1.78877	5.48719	5.62176	5.54647	0.241179	3.82413	-0.24699	2.16622	10.7633
GPCR Main Pathway	15.0267	13.5457	6.39579	17.0691	5.34813	14.4952	3.87865	16.7795	19.8889	14.3811	18.0481	10.8571	7.22023	4.89035	13.5347	5.99749	4.24799	7.13522	9.08417	7.2704	10.6338	10.0898	8.74227	7.05117	3.99688	2.231	4.40951	-14.214	10.454	8.07993	12.4152	-50.522	3.3562	-10.458	-16.5214	3.96567	6.09796	14.2352	11.3992	14.0728	-1.95612	5.38743	6.28903	8.18314	5.50339	5.73234	9.25747	7.81311	12.1705
Growth Hormone Main Pathway	-5.03816	0.268728	-5.44818	-1.99638	-3.39477	1.51042	-1.4416	-0.55711	5.47455	7.3065	7.46444	4.45302	4.684	3.99872	5.36958	2.53206	0.875433	0.0956378	2.99009	3.64382	2.309	1.82452	2.05818	1.71865	0.93215	1.39247	2.41981	0.803786	-14.8347	10.7786	5.2814	-0.281542	0.237075	-8.62541	0.337835	-1.08893	-0.12344	1.6505	-1.55682	0.51947	-0.688422	0.61057	0.433864	1.49356	-0.0342714	-0.116376	1.12269	0.620458	0.590048
GSK3 Main Pathway	12.6809	15.4938	6.27642	7.04937	5.04524	17.5817	4.76764	13.4559	12.9044	10.1955	9.27823	18.7117	16.7187	18.1613	12.8033	5.60713	3.85836	3.79651	7.20527	4.38826	9.01558	10.4177	7.8008	6.89465	5.34678	2.38627	-1.79721	0.439755	7.84187	-6.69956	-2.72393	-40.7682	1.8132	-10.5528	-5.29493	3.83424	5.97923	3.09826	-0.0822446	3.64039	-3.62794	2.97784	2.19171	-0.772612	-0.362644	-0.26542	1.99034	0.967096	5.07638
Hedgehog Main Pathway	-0.0985892	0.0669148	-3.496	-1.3031	-1.5128	0	4.46953	5.29408	0.538053	1.16938	0	0	-0.310974	-0.867167	0	0	0	0.0346465	1.91308	1.1114	2.29836	3.52047	3.87364	0	0.620348	0.621211	-0.23638	-0.201062	-0.497025	2.71023	0.63092	-2.36496	-0.794097	1.68886	-1.93668	0	0	0.704671	-0.184324	0	0	0.620089	0.436263	0	0	-0.0954484	0	-0.969268	0.608521
HGF Main Pathway	-2.33736	-2.32762	-0.947331	7.95681	-2.28093	1.51217	6.23826	10.6041	5.9146	3.47292	3.32807	1.70963	1.09486	2.50808	1.15174	1.73204	0.689505	-0.331535	1.67063	1.24515	-0.791836	-0.0147497	-0.0497461	-0.572321	0	0.533082	3.02232	0.30907	3.58285	11.9709	4.55813	-27.0855	-1.8616	6.85497	-5.09104	0.496257	1.95647	2.97295	2.78729	1.58041	0.773044	1.31078	1.39226	1.70639	0.107898	-0.880683	5.07081	2.00934	3.90369
HIF1-Alpha Main Pathway	2.25843	1.63418	1.78791	4.14241	1.79311	-0.0525101	-0.0102029	-0.937866	0	1.90477	0.809887	1.61265	0.208662	0.804296	0	0	0	-0.579903	0	0	2.12035	1.95315	1.45303	0	0	0	0.033608	0.0976302	5.11333	0.910579	-0.300675	-3.36495	1.25682	-1.31602	-1.37393	-0.139316	1.4973	1.2357	1.35417	3.63684	-0.702637	0.0727892	0.922779	2.0276	0.689204	0.855588	3.1945	0.817275	0.529533
IGF1R Main Pathway	4.26987	4.77639	2.5757	7.78018	6.37682	0.375049	-1.2884	3.33728	4.82314	2.55249	4.13027	-1.71389	-3.07904	-1.76228	1.60348	0.749523	0	1.5507	2.26003	2.49334	0.053267	1.37183	-0.548452	0	1.00836	1.37283	-13.8116	-16.2956	3.69649	-1.4514	4.98519	-8.45339	-0.440645	-0.456838	-1.18956	0.331956	-1.84555	0.737798	0.234366	4.98527	-1.86659	0.467125	2.20273	4.3221	3.29822	0.94726	7.26616	2.6149	-0.304266
IL-10 Main Pathway	0.303429	4.83252	-1.54475	1.46702	-1.07397	1.34054	1.04295	2.4888	7.36863	6.92998	5.85437	16.268	7.03264	12.3654	6.80442	3.81981	2.34161	0	0.448451	0.498963	2.53856	2.01601	1.80095	0	0	0	0.21221	1.21433	2.96552	6.50783	-18.8031	-4.85758	6.65861	-4.30579	-0.277979	-0.688422	1.15031	1.04685	2.96894	7.21299	-0.688422	2.99477	3.38313	1.02374	1.18991	-1.0392	4.06927	0.235275	3.7194
IL-2 Main Pathway	2.75691	8.32704	-4.64072	6.60698	-0.0600813	0.42772	-0.568836	1.80642	11.3495	7.86589	10.8686	1.34486	3.29998	1.50701	3.0188	0.784344	0.714824	-0.63532	1.71389	1.23411	-0.557088	0.44339	0.529554	-0.429904	0.505806	1.13412	3.54675	-32.1385	7.3783	13.16	41.6239	-14.4983	10.8808	-5.93823	-7.35719	0.934955	-0.94152	5.42024	3.63127	6.17626	0.761648	0.59793	0.997776	14.7408	4.53998	1.07024	6.94772	3.78496	-0.531182
IL-6 Main Pathway	3.10437	10.6353	-4.15	1.76794	-6.37944	0.325238	0.431373	1.98222	4.47019	3.90168	7.92759	31.0152	12.0225	19.8594	7.89422	2.91292	0	-5.38903	-4.58988	-4.13956	-0.184018	-0.873505	-1.20395	-3.13251	-2.37983	-2.2829	3.10282	3.4923	9.81254	21.9689	17.4007	-21.6692	34.9121	-28.2486	-27.8813	-2.09103	2.21752	2.13161	4.78911	0.67214	-1.25989	1.8881	-0.174561	-0.313941	-3.03115	-1.51011	-0.520782	2.9187	6.88576
ILK Main Pathway	13.5567	21.3101	15.2135	42.8915	4.90495	38.7838	24.8503	12.8019	41.8942	39.8679	37.9781	27.4623	39.1944	28.7694	18.3603	12.0329	12.1085	6.79298	8.13851	5.08048	9.01296	10.6018	9.2503	4.64859	7.2751	2.09674	-10.4472	-14.8232	21.4782	-18.4381	40.1371	-63.093	4.60505	-28.3465	-9.22215	13.7017	19.2145	21.3563	24.2334	1.39148	4.89014	5.31609	6.06678	5.76032	7.95138	7.09182	10.8706	10.3414	12.3149
Integrin SIgnaling Main Pathway	0.279926	6.38336	5.03162	35.6854	2.54348	16.4335	13.7841	10.1682	27.5112	21.1672	24.2152	11.3408	18.5827	10.9289	5.34918	6.05758	2.39596	0.277832	2.54535	2.69808	-0.767354	0.172118	4.13587	1.46301	3.29621	1.70442	3.34856	2.16159	12.2666	-15.5508	-5.16878	-53.9411	7.38947	-13.6854	1.83075	6.50865	12.5555	5.47161	9.1238	2.77599	2.75762	6.02197	5.66895	8.10176	5.9449	5.90928	10.7554	12.104	3.82577
IP3 Main Pathway	4.84141	2.91104	-0.539651	3.97608	2.93712	-0.915625	-1.0411	9.58069	4.27467	5.38009	6.97612	1.34007	1.06271	0.348371	4.59253	3.26745	1.68216	1.40689	2.91602	3.08084	0.638602	2.08714	-0.521865	-0.0151999	1.78378	2.19177	-12.8026	-13.6988	4.75283	13.7975	13.9757	-10.8601	-4.18582	2.1048	-1.22483	-0.356466	2.87338	0.672079	0.483437	7.3226	-0.877482	1.23115	2.63659	4.50959	1.14946	3.90961	6.5825	3.63107	0.667623
JAK mStat Main Pathway	-1.93648	1.34167	-3.08952	0.89886	-2.5201	-1.47624	-1.84369	-4.10355	3.04941	-0.835709	-1.86773	0.568347	-0.319053	-0.474402	0.741144	-1.21646	-0.529095	-2.03908	-1.2168	-1.25074	1.40759	0.908706	0.770582	1.54981	0.466075	0.399986	-0.56704	0.393553	0.597391	4.78388	13.4578	-12.5764	7.80526	-2.91772	-6.86784	0	1.03375	3.91489	1.02811	2.08741	-0.586116	0.209679	0.936195	2.13576	2.36989	1.37034	4.14504	2.59776	3.37002
JNK Main Pathway	16.6069	12.3613	8.36153	16.4692	6.11932	12.7677	5.98435	13.1644	16.726	13.4378	14.6555	14.5476	8.07811	10.8673	13.7018	10.8153	6.52197	4.48159	3.73702	2.0175	6.95109	9.07518	6.06407	2.90941	3.06473	0.449272	4.78044	-12.8909	-2.56499	27.822	18.3297	-33.5232	-2.42164	-14.8381	-10.0228	4.08894	6.2671	10.7893	6.52907	10.3196	-1.22003	3.40798	3.6026	4.12002	2.80868	3.52711	2.31184	3.93475	18.475
MAPK Family Main Pathway	9.33664	12.3616	-1.33811	8.2363	2.36569	-0.403677	-3.42383	7.86471	12.1	8.92007	14.6454	25.6187	11.0996	20.3957	10.4312	6.95045	2.29018	-1.3722	1.91311	1.50233	2.12474	2.00549	1.60267	3.32222	2.21723	0.968622	-0.348476	1.20829	-20.7383	17.1968	-0.221548	-23.1466	7.91222	-21.9692	-17.4698	-0.138984	4.75423	7.43471	4.15358	12.3734	0.176071	5.87027	2.55769	7.73039	1.78731	2.78131	7.36824	6.62188	11.1248
MAPK Signaling Main Pathway	17.167	26.5724	11.9017	39.951	11.4425	34.9677	17.5115	17.7562	38.2298	34.076	37.7684	31.836	32.4072	27.5466	20.3537	13.2446	7.98655	6.30244	8.49123	7.40881	11.1294	10.7784	10.5618	12.3404	11.8959	7.96168	9.75946	4.11333	-12.5958	4.41457	44.3221	-70.6197	6.64549	-40.3531	-5.50524	10.2713	22.0569	25.688	24.423	9.29863	2.00842	10.9427	8.82143	10.5861	7.58304	10.3172	14.0444	16.8338	17.0397
Mismatch Repair Main Pathway	-4.03423	-3.83003	-2.02258	2.5413	4.54689	0.773842	4.99177	7.55515	-0.706405	-0.866703	-2.513	0	0	0	-3.5144	-2.54143	0	0	0	0	0	0	0	0	0	0.541626	0	0	1.78946	0.124448	1.51792	-0.649025	-0.874492	1.78514	-1.35805	0.72038	0.117597	-1.00562	-1.78443	-2.48157	-1.12401	-1.34248	0.490175	-4.95866	-0.453263	-1.84266	-0.543128	-0.537025	-2.19616
Mitochondrial Apoptosis Main Pathway	-5.71233	-4.91634	-7.16565	-0.651245	-5.10327	-14.2688	-5.94542	-12.685	-9.11198	-7.298	-9.09145	-3.87873	-8.5298	-2.54001	-8.17534	-3.79134	-3.81529	2.12822	0.995206	2.04682	-3.27858	-2.68002	-1.19335	-4.1287	-4.45613	-3.69353	-0.594318	-0.245619	10.9037	-9.57598	-70.7871	25.3785	-0.351807	7.36704	-8.10359	-8.05672	-6.76185	-9.29402	-4.34167	-10.285	-5.43512	-6.46124	-4.4366	-2.25436	-3.33436	-3.74214	-4.90929	-3.67468	-7.45034
mTOR Main Pathway	21.7729	20.4366	10.985	9.83392	11.712	13.7999	3.05722	9.50724	7.48195	5.22846	6.18264	5.91576	11.2587	7.03485	9.26255	4.09081	2.9864	1.33036	3.04714	2.05428	5.29496	7.13567	4.88074	4.64203	2.62455	1.73003	3.30192	-0.832107	-6.47018	11.1526	12.7786	-38.776	-2.40366	-5.52645	-10.8367	4.63394	4.15232	6.47114	9.6743	1.7739	-2.39513	2.17132	2.14819	-0.367162	1.00729	-0.143151	0.763275	3.56266	5.8158
NGF (Negative) Main Pathway	1.9068	-0.0849364	1.16518	2.59408	0.791111	-0.304969	0.463307	0.391391	0.593847	3.19217	3.24248	2.3917	1.32634	1.62097	-0.504316	0	-0.48581	-0.739696	0	0	-0.728293	0	0	0	0	0	0	0	0.285028	-2.55098	-0.524174	-4.06926	0.211508	0.466642	-0.0717084	-0.400505	0	1.14582	1.01408	0.608738	0.419733	0	0	1.73946	0	-0.775199	1.92309	1.38888	-0.904448
NGF (Positive) Main Pathway	1.74272	1.45574	-0.840943	4.98242	0.901563	1.12742	-0.185399	0.10591	4.47277	1.42556	2.79595	-0.0982329	-1.64047	-0.664727	2.20667	0.749523	0.491033	-0.579903	0.448451	0.498963	0.636712	0.44339	0.517016	0	0.514533	0	0.951933	0.460097	0.163399	7.4571	15.7971	-15.8504	3.64301	2.78833	0.817635	-1.10084	-0.12448	1.49497	0.761389	2.27894	0.823088	0.278875	1.3986	3.12026	2.8316	-0.722353	3.89648	0.620458	0.334107
Notch Main Pathway	-0.408127	0.755518	-0.158008	0.622544	-0.99642	0	0.984423	1.93419	2.74518	4.23308	3.37237	-0.0281198	0.860203	1.48675	1.39367	0.927487	0.637649	0.201617	0	0.462796	-0.438113	-0.525542	-0.504234	0	0.42753	0.674505	0.571777	0.490749	-0.667594	2.32612	-0.317467	-1.05386	-0.165429	0.248832	-0.449932	0	0.545925	1.68925	1.35627	-0.556368	0	0	-1.07453	-0.436943	-0.441698	-0.0624056	0.799279	-1.04601	1.14189
p38 (Negative) Main Signaling Pathway	24.1266	32.3834	15.2202	19.5001	8.33122	15.8886	-0.911245	13.5095	31.071	25.5756	26.5328	41.161	19.1342	26.9843	15.3729	9.98703	7.66234	9.69469	8.69707	7.00893	10.7313	10.1882	8.22526	7.78403	4.81038	3.99476	7.62468	7.46274	4.54555	4.34161	39.3739	-57.6372	27.185	-47.8076	-37.5497	6.5207	8.46831	18.8701	17.3441	19.4866	1.97076	7.48937	5.97146	10.3651	5.52544	9.2663	13.3716	9.76288	25.4236
p53 Signaling (Negative) Main Pathway	3.57634	-2.59497	-3.01008	-7.12285	-2.13896	-1.58256	-2.8487	-3.61168	3.03803	4.75724	2.41549	6.22626	1.85893	2.44342	2.29388	0	1.48842	-0.739696	-0.576426	0	-0.133837	0.436057	0	0	0	0	-0.018615	1.83988	-2.51253	0.717403	-3.64952	-5.37856	6.21347	-8.53326	-2.94201	-0.299216	1.0638	-1.18297	-1.19915	2.64573	-1.18783	-0.0131406	1.18247	2.21197	0.181586	1.10665	-0.366878	1.91797	1.23004
PAK Main Pathway	9.82281	21.6601	13.8863	11.9104	4.44121	17.7713	6.89348	17.096	20.2172	16.0612	16.8524	23.9202	8.55358	10.3861	13.5421	6.74398	4.50789	-0.12969	0.116186	-0.500226	0.441057	2.24397	-0.656994	3.25212	2.12948	0.911675	1.0671	1.98001	15.246	-19.6232	38.0353	-53.9448	12.8253	-33.5389	-19.4253	5.22739	6.63201	11.9317	9.96189	9.26367	2.03446	3.58387	3.25099	3.89112	0.656645	5.84385	7.31761	1.92034	15.004
PPAR Main Pathway	6.12783	4.06743	1.98103	4.31322	2.30609	7.29051	5.1486	9.49515	7.19974	8.78735	8.83026	2.7299	2.61129	1.46203	5.39441	4.188	2.79126	0.608093	0.205298	-0.872687	0.913321	1.12198	-0.00972991	2.68366	2.22806	2.37985	-0.756794	0.304602	-9.85688	-2.47226	8.96753	-15.9728	-5.01019	-8.93994	-2.58717	2.5212	4.17651	7.29617	3.45483	0.492723	-1.37825	2.62705	1.70469	2.87574	0.762568	3.50463	2.66707	2.92632	7.95421
PTEN Main Pathway	0.876493	0.553266	1.52259	-1.05167	0.24526	-0.868844	-0.182706	-1.30101	-2.33464	-1.0098	-1.75035	3.9527	2.06765	3.22852	-1.52637	-0.749523	0	0.579903	-1.02488	-0.498963	-1.23117	-0.879447	-0.517016	0	-0.514533	0	-3.72068	0.0810467	-2.61574	-7.0171	1.94625	11.2256	-0.634481	-5.21932	-1.23025	0.688422	1.11862	0.487913	1.74272	-3.51541	0.701589	0.442615	-0.433864	-1.55794	-0.689633	1.47808	-2.45971	-0.620458	-0.0299144
RAS Main Pathway	5.7493	8.86162	-3.19559	18.3001	1.26531	6.64208	6.06088	20.0542	16.0172	12.4841	13.7352	0.791646	4.67472	2.95688	8.60524	3.38994	2.30897	8.1653	12.4528	11.2949	8.68464	7.71638	6.63644	5.05502	4.05711	3.52482	-9.00764	3.73596	8.02364	8.41555	15.8384	-46.4078	-6.67781	9.47269	-3.10132	1.68256	5.78954	7.33106	5.11255	15.659	1.48786	8.15856	3.94166	6.08271	1.69184	1.57547	11.2813	8.62914	8.23463
RNA Polymerase II Complex Pathway	5.92063	1.49521	1.29271	3.94963	3.45424	-0.63993	-0.632047	-0.385738	2.15567	1.9491	1.13761	3.16251	2.5096	2.53167	-0.705205	0.411553	0	0	0	-0.654444	0	0	0	-0.577998	0	0	1.3555	-1.25319	-0.576291	3.50247	-2.9873	-5.47747	-1.94429	1.64221	0.257829	-0.479499	-1.0299	-0.782793	0.632513	1.06155	-0.00843151	-0.053278	0.590443	-1.99123	-1.65257	-0.356557	-1.11631	0.507323	0.316857
SMAD (Negative) Main Pathway	-3.7182	4.0152	-1.99034	2.26118	-1.36475	4.89408	2.84533	2.34747	4.11074	2.73282	3.49627	5.75255	8.19934	2.88527	0.715988	-0.454709	2.11788	0.0145074	-0.579108	-1.1024	1.47265	1.36625	0.967208	0.995418	1.39847	1.73003	-2.01197	-20.9209	0.91255	-13.1814	37.0668	-13.5334	12.3651	-4.67611	-7.91661	3.07286	3.33467	2.31823	3.98481	0.790661	-0.0260229	1.44424	0.0465187	5.14959	5.22596	0.577344	0.88277	-0.763099	0.504302
STAT3 Main Pathway	12.2547	16.4989	14.8441	15.3542	3.34445	4.66094	-0.940909	6.21665	17.0813	9.70015	9.96651	27.7258	11.0667	18.2455	5.74537	4.90421	2.58243	-0.493684	0.061352	0.228551	-0.959103	0.436285	0	0	0.514533	0.592496	3.13638	0.0531466	11.8208	8.19507	-6.3158	-27.4026	19.9309	-29.3495	-20.8238	0.483551	4.1813	10.2942	7.67858	12.3147	2.02145	4.82874	1.87547	5.48403	1.88879	5.60693	5.67634	3.33492	16.7042
TGF beta Main Pathway	17.7872	15.1332	10.9016	7.1046	7.75483	12.3946	0.804188	9.2593	14.1848	6.00662	9.44935	18.4536	4.52979	13.3869	10.7487	7.52008	5.65601	-3.42483	-3.17716	-5.73472	1.68771	3.97177	1.60637	3.34259	2.96522	2.64171	-2.59639	-0.193584	-6.41527	17.869	24.1579	-35.618	12.5117	-25.5128	-23.1072	4.5651	6.23974	6.82984	4.12258	9.74308	-0.972589	3.99618	3.58	4.65676	3.42833	2.90269	3.64261	4.85771	18.3135
TNF (Negative) Main Pathway	3.0207	0.803735	-1.14627	0.494538	-0.816825	-1.23802	-1.18317	-2.22613	0	1.54583	0	0	0	0	-0.478165	-0.726032	0	0	0	0	0	0	0	0	-0.500055	0	-0.742252	1.75056	-0.450874	-0.845179	-2.22104	1.69086	1.39917	-2.07676	-2.18871	-1.53555	0	-1.01924	-0.536261	0	0.419733	0	0	0	-0.605028	-0.584404	0.434584	1.50175	1.90822
TNF (Positive) Main Pathway	-1.21308	1.25329	-4.15688	0.26586	-3.07005	-2.70428	-1.59376	-1.00813	4.24489	3.47636	2.9799	3.90595	2.63684	4.55998	0.323959	-0.726032	-0.48581	1.64494	2.04594	1.9803	0.673709	0	0.498706	0	0.00575104	0	-0.705356	0.978184	-14.5492	0.0842498	17.0466	-2.34812	7.44645	-5.12635	-8.87425	0	-0.650311	2.06168	2.16336	0	-0.419235	0.135041	0.427519	1.80772	0.322861	-0.189958	0.434584	1.38888	0.68237
TRAF (Negative) Main Pathway	1.72928	0.406378	-0.474755	0.080775	-0.616472	-0.571294	-0.425075	-1.60023	0.592711	2.06608	0.496853	0	0	0	0.0747654	0	0	0	0	0	0	0	0	0	0	0	-0.742252	0	-0.450874	0.173086	-1.39314	1.07798	0.41228	-0.993171	-0.856758	-0.427097	0	-0.172412	-0.536261	0	0	0	0	0.631125	0	0.585241	0	0	0.88631
TRAF (Positive) Main Pathway	-0.562571	3.01157	-2.90742	0.348097	-2.30656	-0.892778	-3.8322	-0.313789	6.00243	4.80564	5.54911	12.4015	2.16536	9.45831	2.6971	1.66916	0.491033	0.800868	1.35693	1.24515	2.91989	2.27268	3.06657	0	0	0	-0.21117	-0.407594	-16.398	0.423858	-4.52833	-5.16327	9.53005	-5.78947	-5.09478	-0.400505	-0.650311	0.29	1.00409	1.79921	-1.61993	2.09717	2.97969	1.20531	2.13639	1.40742	3.57379	2.67824	3.34502
Transcription of mRNA Pathway	5.76354	1.87831	0.186753	2.68297	3.21317	-0.63993	-0.632047	-0.812012	0.751309	1.9491	1.13761	3.16251	2.5096	1.94952	0.185344	0.411553	0	0	0	0	0	0	0	0	0	0	0.88361	-1.55654	-0.709387	1.68622	-2.55619	-4.15672	-1.94429	1.64221	0.257829	-0.479499	-1.0299	-0.782793	0.632513	0.523317	-0.00843151	-0.053278	0.590443	-1.99123	-1.65257	-0.356557	-1.11631	0.507323	0.316857
Translation Regulation of EIF4F activity	1.9192	0.28339	-1.21911	1.47791	-0.00495343	0	0.93474	2.64338	-0.334212	-1.44073	-2.18534	-0.83802	0.138203	-1.25952	0.115751	-1.85072	-0.871965	0.967578	1.20776	1.24515	0.702341	0	0.498706	0	0	-0.818357	2.60443	-1.04341	-15.6305	2.71765	15.3743	-9.00372	4.91172	0.34989	-1.52734	0	0.481056	1.40744	0.541268	1.01278	-0.498361	1.75777	2.04036	1.36305	1.23205	-0.228237	2.35627	2.1913	1.20186
Ubiquitin Proteasome Main Pathway	-4.49702	-6.54322	-6.1809	-5.78019	-4.64507	-0.913041	0.928859	0.00272104	1.68707	-1.36947	-0.50137	1.6833	0.51916	-1.72533	0.646802	0.98844	0.619989	3.44143	3.86047	4.05625	3.65491	2.34449	1.73661	3.51214	3.62265	1.19956	1.16568	3.25686	0.975117	-3.60856	-11.1658	-3.09575	-5.31888	4.70433	-3.16405	-3.15489	0.0797272	-2.95639	-3.80118	-1.83342	-3.35847	-0.759253	0.848518	-2.23616	-3.84593	-2.33917	-0.680035	-0.45133	1.0056
VEGF Main Pathway	0.813992	3.22313	-1.76407	5.98453	1.09801	2.94268	1.09239	5.25522	11.1146	9.51106	9.98505	1.75295	4.49471	0.847296	1.09215	0.749523	0.557603	-0.579903	0	0	0	0	0	0	0	0	3.43274	-0.0810467	3.39885	-9.66777	-1.32608	-11.0778	-2.26393	-0.417887	1.09013	0	0	-0.0707774	0.401463	3.48258	0	0.537329	0.502331	1.63098	1.27288	-0.799381	2.54796	1.43773	0.930418
Wnt Main Pathway	11.7917	10.8666	1.9576	15.7573	11.0032	6.51141	1.11105	8.49769	19.1626	17.8724	21.4405	9.54919	12.0739	11.0101	5.73111	3.30958	1.56977	0.576949	1.79875	2.377	6.22071	4.27377	4.10625	0.377072	1.866	2.22567	5.82966	-11.5007	-11.7548	-2.77541	18.4635	-22.6405	-5.13878	14.0247	-6.5009	1.49756	2.06667	9.27785	-0.905633	11.1413	4.00737	5.10185	4.00702	0.426068	5.98674	2.43545	8.93139	5.39674	2.96533
[truncated: 33 more columns]
